# Supplementary material for: Is It High Time to Increase Elite Soccer Substitutions Permanently?
Source: PubMed Central journal article supplement (PMC7579365; doi:10.3390/ijerph17197008), 2020-09-25
Supplement: ijerph-17-07008-s001.pdf [file ijerph-17-07008-s001.pdf]

**Table S1.** Top four teams to obtain the number of games per season (2018-2019), international, men, elite of each sport.

| <b>soccer</b>     | <b>futsal</b>   | <b>basketball</b> | <b>handball</b>        |
|-------------------|-----------------|-------------------|------------------------|
| Liverpool         | Magnus          | CSKA Moscow       | Vardar Skopje (50)     |
| Tottenham Hotspur | Sporting Lisboa | Real Madrid       | Barcelona Lassa (53)   |
| Flamengo          | Corinthians     | Barcelona Lassa   | MVM Veszprém (51)      |
| River Plate       | Barcelona       | Anadolu Efes      | Vive Targi Kielce (52) |

a) soccer - the best of Europe UEFA Champions League and South America Libertadores; b) futsal – the top four on the last World Intercontinental Futsal Cupfutsal. The information from Boca Juniors (from Argentina) was not found, so data from Sporting Lisboa (2018-2019 champion of the UEFA Futsal Champions League) was used; c) basketball – top teams of UEFA Basketball League; d) handball – top teams of the European Handball Federation.
